# Supplementary material for: A Survey of PICU Clinician Practices and Perceptions regarding Respiratory Cultures in the Evaluation of Ventilator-Associated Infections in the BrighT STAR Collaborative
Source: PubMed Central journal article supplement — Pediatr Crit Care Med. 2023 Oct 9;25(1):e20–30. doi: 10.1097/PCC.0000000000003379 (PMC10756695; doi:10.1097/pcc.0000000000003379), 2023-10-09
Supplement: pcc-25-e20-s002.pdf [file pcc-25-e20-s002.pdf]

## **Supplemental Files**

- 1. Supplemental Figure 1. Survey questions**
- 2. Supplemental Figure 2. Respiratory culture rates**
- 3. Supplemental Table 1. Distribution of survey responses for all questions**
- 4. Supplemental Table 2. Correlation analysis between survey responses and respiratory culture rates per 100 ventilator-days for all questions**
- 5. Supplemental Table 3. Comparing survey responses from clinicians to nurses and respiratory therapists.**

### **Bright STAR Respiratory Culture Practices Survey**

The purpose of this survey is to assess practices and perceptions about **respiratory secretion cultures from mechanically ventilated patients**. Some people refer to these cultures as **endotracheal aspirate, tracheal** or **sputum cultures**. For simplicity, we refer to these cultures as “**respiratory cultures**” below.

#### **Section 1:**

1. Which position best describes your current role in the ICU?

|                       |                        |
|-----------------------|------------------------|
| Registered Nurse      | Nurse Practitioner     |
| Respiratory Therapist | Physician Assistant    |
| Hospitalist           | Fellow Physician       |
| Attending Physician   | Other (Please specify) |
  
2. How many years of experience do you have working in a pediatric ICU? (Attending Physicians – Include your fellowship years)

|             |            |
|-------------|------------|
| 0-5 years   | 6-10 years |
| 11-20 years | >20 years  |

#### **Section 2: Respiratory Culture Practices:**

3. How often are the following **methods** used to collect secretions for respiratory cultures from patients with **endotracheal tubes** in your unit (Rarely/Never, Sometimes, Often, I don't know):
  - a. Inline endotracheal aspirate
  - b. Open suctioning
  - c. Nasopharyngeal aspirate
  - d. Bronchial brushing or “mini” bronchoalveolar lavage
  - e. Bronchoalveolar lavage
  
4. How often are the following **methods** used to collect secretions for respiratory cultures from patients with **tracheostomies** in your unit (Rarely/Never, Sometimes, Often, I don't know):
  - a. Inline endotracheal aspirate
  - b. Open suctioning
  - c. Nasopharyngeal aspirate
  - d. Bronchial brushing or “mini” bronchoalveolar lavage
  - e. Bronchoalveolar lavage
  
5. Who typically **collects** the respiratory secretion samples to send for culture in your unit? (Select all that apply)
  - a. Nurse
  - b. Respiratory Therapist
  - c. Advanced Practice Provider (NP or PA)
  - d. Attending Physician
  - e. Other role (Specify)
  - f. I don't know
  
6. How often is **saline lavage** used with endotracheal aspiration to obtain a sample to send for culture (i.e. instillation of saline into the airway, then suctioning out the saline to send for culture)?
  - a. Rarely or never
  - b. Sometimes

- c. Often
  - d. I don't know
7. If your unit does use saline lavage or saline instillation during sample collection, is there a suggested **volume of saline** that is used?
- a. No, there is not a recommended volume of saline to use
  - b. Yes, there is a recommended volume of saline to use (specify volume in mL below)
  - c. I don't know or not applicable
8. In general, how often is the decision to order a respiratory culture made by the following (Rarely/Never, Sometimes, Often):
- a. Respiratory Therapist
  - b. Nurse
  - c. Advanced Practice Provider (NP, PA)
  - d. Resident Physician
  - e. Fellow Physician
  - f. Attending Physician
9. In general in your unit, how likely would a respiratory culture be ordered for a ventilated patient in the following scenarios? *Assume the patient has not had a recent respiratory culture* (Answer Options: Very Unlikely, Unlikely, Neutral, Likely, Very Likely)
- a. New fever *without other symptoms*
  - b. Persistent fever *without other symptoms*
  - c. New hypotension *without respiratory symptoms*
  - d. Increased volume of secretions *without other symptoms*
  - e. Change in color or thickness of secretions *without other symptoms*
  - f. Increased ventilator support *without other symptoms*
  - g. New opacity on chest imaging *without other symptoms*
  - h. New laboratory change that can be seen with infections (e.g. elevation in WBC or CRP) *without other symptoms*
  - i. New fever AND laboratory changes (e.g. elevation in WBC or CRP) *without respiratory symptoms*
  - j. New fever AND increased secretions *without increase in ventilator support*
  - k. New fever AND increased ventilator/oxygen support
  - l. Request from consulting service (e.g. Oncology, Surgery, Infectious Diseases)
  - m. Request from parent/caregiver
  - n. Surveillance culture in asymptomatic patient
  - o. Respiratory culture obtained concurrent with blood and urine culture (i.e., "pan culture")
10. Which clinical change do you think is **the most common reason** respiratory cultures are ordered from mechanically ventilated patients in your unit?
- a. Increased ventilator/oxygen requirement
  - b. Inability to wean ventilator/oxygen support
  - c. Change in description of secretions
  - d. New fever
  - e. Persistent/recurrent fevers
  - f. Laboratory changes (e.g. increased WBC or CRP)
  - g. Findings on chest X-ray

### **Section 3: Perceptions, Barriers and Implementation:**

11. To what extent do you agree or disagree with the following statements about respiratory cultures *in general*? (Answer Options: Strongly Disagree, Disagree, Neutral, Agree, Strongly Agree)
- I feel **confident about indications** to obtain a respiratory culture
  - All ventilated PICU patients with **new fever** should get a respiratory culture
  - All ventilated PICU patients with **increased secretions** should get a respiratory culture
  - Respiratory cultures are likely to grow bacteria from patients with **tracheostomies**
  - Respiratory cultures are likely to grow bacteria from patients with **endotracheal tubes**
  - The information from respiratory cultures is **useful to guide antibiotic therapy**
  - Medication changes** can influence secretion characteristics (e.g. diuretics, sedatives)
  - It is **easy to obtain a secretion specimen** to send for respiratory culture
  - I would find a decision support algorithm **helpful** to guide when to obtain a respiratory culture
  - I expect **I would follow** a decision support algorithm guiding when to obtain respiratory cultures
12. To what extent do you agree or disagree with the following statements about respiratory cultures practices *in your unit*? (Answer Options: Strongly Disagree, Disagree, Neutral, Agree, Strongly Agree)
- Respiratory cultures are ordered **too frequently** in our unit
  - The **attending physician** is typically included in the decision-making process to order a respiratory culture
  - Nurses** are typically included in the decision-making process to order a respiratory culture
  - Respiratory therapists** are typically included in the decision-making process to order a respiratory culture
  - Clinicians always conduct a **physical exam** before they order a new respiratory culture
  - Clinicians always review patients' **microbiology history** to see if they have had a recent respiratory culture before ordering a new one
  - Clinicians always review **vital signs and other clinical data** (e.g. labs, X-rays) before ordering a respiratory culture
  - Consulting services** play an important role in the decision to order a respiratory culture (e.g. Oncologist, Infectious Diseases, Surgery Services)
  - Clinicians have a **low threshold** to order respiratory cultures in response to clinical changes such as fever
  - Respiratory culture ordering practices **vary among clinicians**
  - Respiratory culture ordering practices **vary among patient populations** (i.e. oncology patients, patient with tracheostomies)
  - A decision support algorithm guiding when to obtain respiratory cultures would **help align the ICU team and/or consulting teams** regarding need for respiratory cultures from ventilated patients
13. To what extent do you agree with the following factors that **could be a barrier** to changing respiratory culture practices in your unit? (Answer Options: Strongly Disagree, Disagree, Neutral, Agree, Strongly Agree)
- Practices vary widely** between clinicians, so it will be difficult to standardize

- b. Some clinicians may be **reluctant to change** their practices
  - c. There is **insufficient evidence** that respiratory cultures can be reduced safely
  - d. Clinicians may not change practices due to **concern for missing a diagnosis** of ventilator-associated pneumonia or tracheitis
  - e. It is difficult to review **pertinent clinical information from the electronic medical record** before ordering a respiratory culture (due to time constraints)
  - f. It is difficult to perform **physical exams** prior to ordering a respiratory culture (due to time constraints)
  - g. **High patient care workload** may make it difficult to change respiratory culture practices
  - h. It is difficult to change respiratory culture practices for **medically complex patients**
  - i. Opinion of **consulting services** may differ
  - j. Opinion of **patient/caregiver** may differ
14. Please describe any other potential barriers to changing respiratory culture practices in your unit.
15. Which methods for improving respiratory culture practices do you think would be **most effective** in your unit (Select all that apply):
- a. Decision support algorithm or guideline
  - b. Written educational materials
  - c. Didactic presentation or lecture
  - d. Brief educational video
  - e. Criteria enforced by laboratory (e.g. repeated samples not processed within 3 days)
  - f. Guidance built into EMR order
  - g. Feedback about unit performance
  - h. Feedback about individual performance
  - i. Involving parents/caregivers as advocates
  - j. Other (Enter response if other ideas)

**Supplemental Figure 2. Respiratory culture rates**

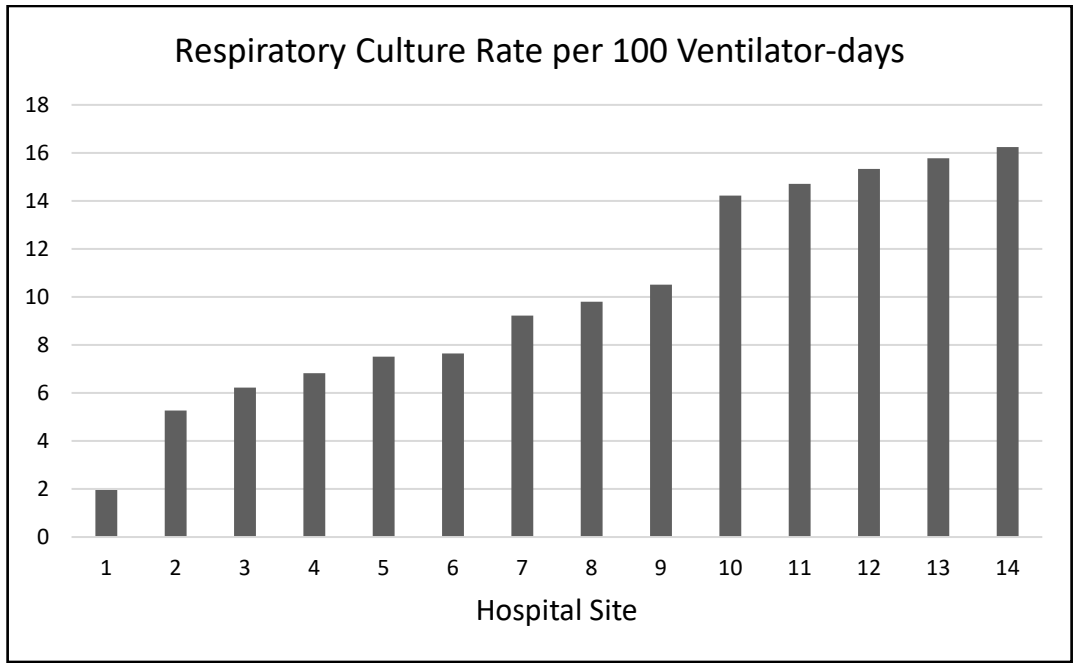

**Supplemental Figure 2 footnotes:**

Respiratory culture rates were calculated as an average of the 2019 and 2020 monthly respiratory culture rates per 100 ventilator-days. Culture types included endotracheal cultures, tracheal cultures, bronchial brush and sputum cultures. Culture types excluded bronchoalveolar lavage cultures, nasopharyngeal and tissue cultures.

| <b>Supplemental Table 1. Proportion of survey responses in agreement across sites for all questions.</b> |                        |            |      |                |                |
|----------------------------------------------------------------------------------------------------------|------------------------|------------|------|----------------|----------------|
| <b>Abbreviated question</b>                                                                              | <b>Median response</b> | <b>IQR</b> |      | <b>Minimum</b> | <b>Maximum</b> |
| For endotracheal tube, often collect via open suctioning                                                 | 0.23                   | 0.14       | 0.45 | 0.02           | 0.80           |
| For endotracheal tube, often collect via inline endotracheal aspirate                                    | 0.82                   | 0.57       | 0.89 | 0.14           | 0.95           |
| For endotracheal tube, often collect via nasopharyngeal aspirate                                         | 0.08                   | 0.06       | 0.17 | 0.04           | 0.27           |
| For endotracheal tube, often collect via bronchial brushing or "mini" BAL                                | 0.04                   | 0.00       | 0.07 | 0.00           | 0.77           |
| For endotracheal tube, often collect via BAL                                                             | 0.05                   | 0.00       | 0.15 | 0.00           | 0.27           |
| For tracheostomy, often collect via inline endotracheal aspirate                                         | 0.71                   | 0.44       | 0.81 | 0.31           | 0.90           |
| For tracheostomy, often collect via open suctioning                                                      | 0.40                   | 0.25       | 0.50 | 0.02           | 0.80           |
| For tracheostomy, often collect via nasopharyngeal aspirate                                              | 0.05                   | 0.00       | 0.12 | 0.00           | 0.27           |
| For tracheostomy, often collect via bronchial brushing or "mini" BAL                                     | 0.00                   | 0.00       | 0.04 | 0.00           | 0.49           |
| For tracheostomy, often collect via BAL                                                                  | 0.05                   | 0.00       | 0.08 | 0.00           | 0.17           |
| Saline lavage is often used to obtain sample                                                             | 0.39                   | 0.29       | 0.48 | 0.12           | 0.65           |
| Saline lavage is sometimes used to obtain sample                                                         | 0.41                   | 0.38       | 0.56 | 0.32           | 0.74           |
| There is a suggested volume of saline that is used                                                       | 0.04                   | 0.00       | 0.08 | 0.00           | 0.33           |
| Samples are typically collected by APPs                                                                  | 0.00                   | 0.00       | 0.02 | 0.00           | 0.04           |
| Samples are typically collected by RT                                                                    | 0.99                   | 0.89       | 1.00 | 0.55           | 1.00           |
| Samples are typically collected by Nurses                                                                | 0.51                   | 0.23       | 0.77 | 0.05           | 1.00           |
| Samples are typically collected by Physicians                                                            | 0.01                   | 0.00       | 0.05 | 0.00           | 0.18           |
| Samples are typically collected by Other Role                                                            | 0.06                   | 0.01       | 0.09 | 0.00           | 0.19           |
| Decision to order culture is often made by the Attending                                                 | 0.86                   | 0.72       | 0.91 | 0.68           | 0.95           |
| Decision to order culture is often made by the Fellow                                                    | 0.82                   | 0.59       | 0.91 | 0.32           | 1.00           |
| Decision to order culture is often made by the APP                                                       | 0.69                   | 0.60       | 0.77 | 0.41           | 0.90           |
| Decision to order culture is often made by the Resident                                                  | 0.43                   | 0.35       | 0.58 | 0.21           | 0.78           |
| Decision to order culture is often made by the Nurse                                                     | 0.05                   | 0.00       | 0.09 | 0.00           | 0.18           |
| Decision to order culture is often made by the RT                                                        | 0.05                   | 0.01       | 0.10 | 0.00           | 0.12           |
| Findings on chest X-ray                                                                                  | 0.01                   | 0.00       | 0.04 | 0.00           | 0.18           |
| New fever                                                                                                | 0.30                   | 0.21       | 0.42 | 0.06           | 0.62           |
| Laboratory changes (e.g. increased WBC or CRP)                                                           | 0.03                   | 0.02       | 0.05 | 0.00           | 0.07           |
| Persistent/recurrent fevers                                                                              | 0.14                   | 0.08       | 0.21 | 0.00           | 0.24           |
| Change in description of secretions                                                                      | 0.33                   | 0.27       | 0.43 | 0.16           | 0.50           |
| Increased ventilator/oxygen requirement                                                                  | 0.13                   | 0.06       | 0.21 | 0.00           | 0.33           |

|                                                                                                              |      |      |      |      |      |
|--------------------------------------------------------------------------------------------------------------|------|------|------|------|------|
| Inability to wean ventilator/oxygen support                                                                  | 0.00 | 0.00 | 0.00 | 0.00 | 0.05 |
| New fever without other symptoms                                                                             | 0.48 | 0.38 | 0.59 | 0.20 | 0.86 |
| Persistent fever without other symptoms                                                                      | 0.72 | 0.64 | 0.81 | 0.50 | 0.91 |
| New hypotension without respiratory symptoms                                                                 | 0.23 | 0.17 | 0.30 | 0.05 | 0.50 |
| Increased volume of secretions without other symptom                                                         | 0.53 | 0.40 | 0.62 | 0.33 | 0.82 |
| Change in color or thickness of secretions without other symptoms                                            | 0.67 | 0.54 | 0.78 | 0.33 | 0.85 |
| Increased ventilator support without other symptoms                                                          | 0.34 | 0.29 | 0.44 | 0.19 | 0.68 |
| New opacity on chest imaging without other symptoms                                                          | 0.43 | 0.39 | 0.54 | 0.23 | 0.69 |
| New laboratory change that can be seen with infections (e.g. elevation in WBC or CRP) without other symptoms | 0.49 | 0.38 | 0.57 | 0.28 | 0.95 |
| New fever AND laboratory changes (e.g. elevation in WBC or CRP) without respiratory symptoms                 | 0.67 | 0.54 | 0.79 | 0.44 | 0.91 |
| New fever AND increased secretions without increase in ventilator support                                    | 0.85 | 0.81 | 0.94 | 0.69 | 0.95 |
| New fever AND increased ventilator/oxygen support                                                            | 0.90 | 0.85 | 0.95 | 0.81 | 1.00 |
| Request from consulting service (e.g. Oncology, Surgery, Infectious Diseases)                                | 0.76 | 0.72 | 0.84 | 0.64 | 0.94 |
| Request from parent/caregiver                                                                                | 0.18 | 0.13 | 0.27 | 0.07 | 0.36 |
| Surveillance culture in asymptomatic patient                                                                 | 0.06 | 0.04 | 0.08 | 0.00 | 0.15 |
| Respiratory culture obtained concurrent with blood and urine culture (i.e., "pan culture")                   | 0.76 | 0.70 | 0.86 | 0.52 | 0.93 |
| I feel confident about indications to obtain a respiratory culture                                           | 0.69 | 0.56 | 0.74 | 0.38 | 0.82 |
| All ventilated PICU patients with new fever should get a respiratory culture                                 | 0.27 | 0.17 | 0.41 | 0.05 | 0.64 |
| All ventilated PICU patients with increased secretions should get a respiratory culture                      | 0.28 | 0.19 | 0.41 | 0.12 | 0.59 |
| Respiratory cultures are likely to grow bacteria from patients with tracheostomies                           | 0.85 | 0.79 | 0.90 | 0.68 | 0.95 |
| Respiratory cultures are likely to grow bacteria from patients with endotracheal tubes                       | 0.42 | 0.34 | 0.54 | 0.23 | 0.61 |
| The information from respiratory cultures is useful to guide antibiotic therapy                              | 0.80 | 0.69 | 0.89 | 0.62 | 0.97 |
| Medication changes can influence secretion characteristics                                                   | 0.84 | 0.80 | 0.87 | 0.67 | 0.91 |
| It is easy to obtain a secretion specimen                                                                    | 0.71 | 0.67 | 0.84 | 0.61 | 1.00 |
| I would find a decision support algorithm helpful                                                            | 0.79 | 0.71 | 0.83 | 0.64 | 0.93 |
| I expect I would follow a decision support algorithm                                                         | 0.82 | 0.77 | 0.89 | 0.72 | 0.94 |
| Respiratory cultures are ordered too frequently in our unit                                                  | 0.30 | 0.25 | 0.45 | 0.00 | 0.54 |



|                                                                                                                                |      |      |      |      |      |
|--------------------------------------------------------------------------------------------------------------------------------|------|------|------|------|------|
| The attending physician is typically included in the decision-making process                                                   | 0.73 | 0.59 | 0.88 | 0.20 | 1.00 |
| Nurses are typically included in the decision-making process                                                                   | 0.40 | 0.24 | 0.55 | 0.17 | 0.70 |
| Respiratory therapists are typically included in the decision-making process                                                   | 0.48 | 0.33 | 0.57 | 0.26 | 0.81 |
| Clinicians always conduct a physical exam                                                                                      | 0.24 | 0.17 | 0.29 | 0.14 | 0.43 |
| Clinicians always review patients' microbiology history                                                                        | 0.49 | 0.43 | 0.55 | 0.38 | 0.69 |
| Clinicians always review vital signs and other clinical data (e.g. labs, X-rays)                                               | 0.58 | 0.56 | 0.69 | 0.38 | 0.80 |
| Consulting services play an important role in the decision to order a respiratory culture                                      | 0.39 | 0.29 | 0.51 | 0.21 | 0.56 |
| Clinicians have a low threshold to order respiratory cultures                                                                  | 0.57 | 0.45 | 0.71 | 0.19 | 0.90 |
| Respiratory culture ordering practices vary among clinicians                                                                   | 0.84 | 0.79 | 0.89 | 0.61 | 1.00 |
| Respiratory culture ordering practices vary among patient populations                                                          | 0.76 | 0.69 | 0.81 | 0.59 | 1.00 |
| A decision support algorithm guiding when to obtain respiratory cultures would help align the ICU team and/or consulting teams | 0.82 | 0.79 | 0.88 | 0.70 | 0.93 |
| Opinion of patient/caregiver may differ                                                                                        | 0.42 | 0.38 | 0.57 | 0.30 | 0.69 |
| It is difficult to change respiratory culture practices for medically complex patients                                         | 0.40 | 0.32 | 0.50 | 0.19 | 0.60 |
| Opinion of consulting services may differ                                                                                      | 0.64 | 0.61 | 0.68 | 0.41 | 0.76 |
| Clinicians may not change practices due to concern for missing a diagnosis of ventilator-associated pneumonia or tracheitis    | 0.62 | 0.50 | 0.70 | 0.31 | 0.77 |
| There is insufficient evidence that respiratory cultures can be reduced safely                                                 | 0.17 | 0.11 | 0.24 | 0.03 | 0.50 |
| It is difficult to perform physical exams prior to ordering a respiratory culture                                              | 0.09 | 0.05 | 0.11 | 0.02 | 0.14 |
| Practices vary widely between clinicians, so it will be difficult to standardize                                               | 0.47 | 0.41 | 0.57 | 0.31 | 0.82 |
| Some clinicians may be reluctant to change their practices                                                                     | 0.70 | 0.58 | 0.78 | 0.41 | 0.91 |
| It is difficult to review pertinent clinical information from the electronic medical record                                    | 0.12 | 0.09 | 0.21 | 0.06 | 0.36 |
| High patient care workload may make it difficult                                                                               | 0.32 | 0.24 | 0.41 | 0.06 | 0.59 |

| <b>Supplemental Table 2. Correlation analysis between survey responses (proportion that agree) and site's respiratory culture rates per 1000 ICU patient-days</b> |                                  |                |
|-------------------------------------------------------------------------------------------------------------------------------------------------------------------|----------------------------------|----------------|
| <b>Abbreviated question</b>                                                                                                                                       | <b>Correlation coefficient r</b> | <b>P value</b> |
| New fever without other symptoms                                                                                                                                  | 0.71                             | 0.004          |
| Persistent fever without other symptoms                                                                                                                           | 0.77                             | 0.001          |
| New hypotension without respiratory symptoms                                                                                                                      | 0.61                             | 0.02           |
| Increased volume of secretions without other symptom                                                                                                              | 0.36                             | 0.20           |
| Change in color or thickness of secretions without other symptoms                                                                                                 | 0.35                             | 0.22           |
| Increased ventilator support without other symptoms                                                                                                               | 0.24                             | 0.42           |
| New opacity on chest imaging without other symptoms                                                                                                               | 0.04                             | 0.88           |
| New laboratory change that can be seen with infections (e.g. elevation in WBC or CRP) without other symptoms                                                      | 0.21                             | 0.46           |
| New fever AND laboratory changes (e.g. elevation in WBC or CRP) without respiratory symptoms                                                                      | 0.63                             | 0.02           |
| New fever AND increased secretions without increase in ventilator support                                                                                         | 0.72                             | 0.003          |
| New fever AND increased ventilator/oxygen support                                                                                                                 | 0.14                             | 0.636          |
| Request from consulting service (e.g. Oncology, Surgery, Infectious Diseases)                                                                                     | 0.29                             | 0.32           |
| Request from parent/caregiver                                                                                                                                     | -0.01                            | 0.97           |
| Surveillance culture in asymptomatic patient                                                                                                                      | 0.19                             | 0.51           |
| Respiratory culture obtained concurrent with blood and urine culture (i.e., "pan culture")                                                                        | 0.62                             | 0.03           |
| Top reason: Findings on chest X-ray                                                                                                                               | -0.20                            | 0.50           |
| Top reason: New fever                                                                                                                                             | 0.46                             | 0.10           |
| Top reason: Laboratory changes (e.g. increased WBC or CRP)                                                                                                        | 0.14                             | 0.64           |
| Top reason: Persistent/recurrent fevers                                                                                                                           | 0.38                             | 0.18           |
| Top reason: Change in description of secretions                                                                                                                   | -0.10                            | 0.75           |
| Top reason: Increased ventilator/oxygen requirement                                                                                                               | -0.19                            | 0.52           |
| Top reason: Inability to wean ventilator/oxygen support                                                                                                           | 0.20                             | 0.49           |
| I feel confident about indications to obtain a respiratory culture                                                                                                | 0.38                             | 0.18           |
| All ventilated PICU patients with new fever should get a respiratory culture                                                                                      | 0.34                             | 0.23           |
| All ventilated PICU patients with increased secretions should get a respiratory culture                                                                           | 0.41                             | 0.14           |
| Respiratory cultures are likely to grow bacteria from patients with tracheostomies                                                                                | -0.23                            | 0.43           |
| Respiratory cultures are likely to grow bacteria from patients with endotracheal tubes                                                                            | -0.09                            | 0.77           |

|                                                                                                                                |       |      |
|--------------------------------------------------------------------------------------------------------------------------------|-------|------|
| The information from respiratory cultures is useful to guide antibiotic therapy                                                | 0.44  | 0.11 |
| Medication changes can influence secretion characteristics                                                                     | -0.17 | 0.57 |
| It is easy to obtain a secretion specimen                                                                                      | 0.33  | 0.26 |
| I would find a decision support algorithm helpful                                                                              | -0.66 | 0.01 |
| I expect I would follow a decision support algorithm                                                                           | 0.02  | 0.95 |
| Respiratory cultures are ordered too frequently in our unit                                                                    | 0.41  | 0.16 |
| The attending physician is typically included in the decision-making process                                                   | 0.17  | 0.55 |
| Nurses are typically included in the decision-making process                                                                   | -0.06 | 0.84 |
| Respiratory therapists are typically included in the decision-making process                                                   | 0.00  | 0.99 |
| Clinicians always conduct a physical exam                                                                                      | 0.01  | 0.97 |
| Clinicians always review patients' microbiology history                                                                        | 0.53  | 0.05 |
| Clinicians always review vital signs and other clinical data (e.g. labs, X-rays)                                               | 0.09  | 0.76 |
| Consulting services play an important role in the decision to order a respiratory culture                                      | 0.00  | 0.99 |
| Clinicians have a low threshold to order respiratory cultures                                                                  | 0.50  | 0.07 |
| Respiratory culture ordering practices vary among clinicians                                                                   | -0.37 | 0.20 |
| Respiratory culture ordering practices vary among patient populations                                                          | -0.16 | 0.59 |
| A decision support algorithm guiding when to obtain respiratory cultures would help align the ICU team and/or consulting teams | -0.57 | 0.04 |
| Opinion of patient/caregiver may differ                                                                                        | -0.05 | 0.86 |
| It is difficult to change respiratory culture practices for medically complex patients                                         | 0.27  | 0.35 |
| Opinion of consulting services may differ                                                                                      | 0.06  | 0.84 |
| Clinicians may not change practices due to concern for missing a diagnosis of ventilator-associated pneumonia or tracheitis    | 0.19  | 0.51 |
| There is insufficient evidence that respiratory cultures can be reduced safely                                                 | 0.03  | 0.94 |
| It is difficult to perform physical exams prior to ordering a respiratory culture                                              | -0.12 | 0.69 |
| Practices vary widely between clinicians, so it will be difficult to standardize                                               | -0.15 | 0.62 |
| Some clinicians may be reluctant to change their practices                                                                     | -0.21 | 0.47 |
| It is difficult to review pertinent clinical information from the electronic medical record                                    | -0.39 | 0.17 |
| High patient care workload may make it difficult                                                                               | 0.07  | 0.82 |

| <b>Supplemental Table 3. Comparison of Clinicians Responses to Survey Questions to Nurses and Respiratory Therapists</b> |                   |                                |      |                |
|--------------------------------------------------------------------------------------------------------------------------|-------------------|--------------------------------|------|----------------|
| <b>Abbreviated question</b>                                                                                              | <b>Odds Ratio</b> | <b>95% Confidence Interval</b> |      | <b>P-value</b> |
| For endotracheal tube, often collect via inline endotracheal aspirate                                                    | 0.45              | 0.32                           | 0.63 | <0.001         |
| For endotracheal tube, often collect via open suctioning                                                                 | 1.45              | 0.8                            | 2.61 | 0.22           |
| For endotracheal tube, often collect via nasopharyngeal aspirate                                                         | 0.31              | 0.12                           | 0.81 | 0.02           |
| For endotracheal tube, often collect via bronchial brushing or "mini" BAL                                                | 1.23              | 0.43                           | 3.52 | 0.70           |
| For endotracheal tube, often collect via BAL                                                                             | 0.45              | 0.28                           | 0.7  | <0.001         |
| For tracheostomy, often collect via inline endotracheal aspirate                                                         | 0.41              | 0.26                           | 0.64 | <0.001         |
| For tracheostomy, often collect via open suctioning                                                                      | 1.69              | 0.97                           | 2.95 | 0.06           |
| For tracheostomy, often collect via nasopharyngeal aspirate                                                              | 0.46              | 0.16                           | 1.34 | 0.16           |
| For tracheostomy, often collect via bronchial brushing or "mini" BAL                                                     | 3.08              | 1.23                           | 7.75 | 0.02           |
| For tracheostomy, often collect via BAL                                                                                  | 0.43              | 0.24                           | 0.76 | 0.004          |
| Samples are typically collected by Nurses                                                                                | 0.96              | 0.7                            | 1.31 | 0.79           |
| Samples are typically collected by RT                                                                                    | 1                 | 0.52                           | 1.93 | 1.00           |
| Samples are typically collected by APPs                                                                                  | 0.97              | 0.26                           | 3.6  | 0.96           |
| Samples are typically collected by Physicians                                                                            | 0.83              | 0.46                           | 1.51 | 0.55           |
| Samples are typically collected by Other Role                                                                            | 1.37              | 0.73                           | 2.55 | 0.33           |
| Saline lavage is often used to obtain sample                                                                             | 1.23              | 0.68                           | 2.22 | 0.49           |
| Saline lavage is sometimes used to obtain sample                                                                         | 0.98              | 0.6                            | 1.59 | 0.93           |
| There is a suggested volume of saline that is used                                                                       | 1.1               | 0.22                           | 5.61 | 0.90           |
| Decision to order culture is often made by the RT                                                                        | 0.12              | 0.04                           | 0.31 | <0.001         |
| Decision to order culture is often made by the Nurse                                                                     | 0.21              | 0.1                            | 0.43 | <0.001         |
| Decision to order culture is often made by the APP                                                                       | 0.47              | 0.32                           | 0.69 | <0.001         |
| Decision to order culture is often made by the Resident                                                                  | 0.43              | 0.31                           | 0.59 | <0.001         |
| Decision to order culture is often made by the Fellow                                                                    | 0.55              | 0.32                           | 0.93 | 0.03           |
| Decision to order culture is often made by the Attending                                                                 | 1.02              | 0.65                           | 1.6  | 0.94           |
| New fever without other symptoms                                                                                         | 0.68              | 0.5                            | 0.93 | 0.02           |
| Persistent fever without other symptoms                                                                                  | 1.03              | 0.71                           | 1.49 | 0.87           |
| New hypotension without respiratory symptoms                                                                             | 1.87              | 1.13                           | 3.1  | 0.02           |
| Increased volume of secretions without other symptom                                                                     | 0.47              | 0.31                           | 0.7  | <0.001         |

|                                                                                                              |      |      |       |        |
|--------------------------------------------------------------------------------------------------------------|------|------|-------|--------|
| Change in color or thickness of secretions without other symptoms                                            | 0.29 | 0.23 | 0.37  | <0.001 |
| Increased ventilator support without other symptoms                                                          | 0.79 | 0.6  | 1.04  | 0.09   |
| New opacity on chest imaging without other symptoms                                                          | 0.77 | 0.54 | 1.09  | 0.15   |
| New laboratory change that can be seen with infections (e.g. elevation in WBC or CRP) without other symptoms | 0.34 | 0.24 | 0.48  | <0.001 |
| New fever AND laboratory changes (e.g. elevation in WBC or CRP) without respiratory symptoms                 | 0.92 | 0.63 | 1.35  | 0.68   |
| New fever AND increased secretions without increase in ventilator support                                    | 1.33 | 0.74 | 2.41  | 0.34   |
| New fever AND increased ventilator/oxygen support                                                            | 2.42 | 1.31 | 4.47  | 0.005  |
| Request from consulting service (e.g. Oncology, Surgery, Infectious Diseases)                                | 1.5  | 0.93 | 2.42  | 0.09   |
| Request from parent/caregiver                                                                                | 0.93 | 0.7  | 1.25  | 0.65   |
| Surveillance culture in asymptomatic patient                                                                 | 0.16 | 0.04 | 0.68  | 0.01   |
| Respiratory culture obtained concurrent with blood and urine culture (i.e., "pan culture")                   | 1.26 | 0.81 | 1.96  | 0.31   |
| Top reason: Increased ventilator/oxygen requirement                                                          | 3.68 | 2.27 | 5.96  | <0.001 |
| Top reason: Inability to wean ventilator/oxygen support                                                      | 0.63 | 0.06 | 7.14  | 0.71   |
| Top reason: Change in description of secretions                                                              | 0.33 | 0.23 | 0.49  | <0.001 |
| Top reason: New fever                                                                                        | 1.78 | 1.32 | 2.41  | <0.001 |
| Top reason: Persistent/recurrent fevers                                                                      | 0.93 | 0.67 | 1.28  | 0.64   |
| Top reason: Laboratory changes (e.g. increased WBC or CRP)                                                   | 0.3  | 0.11 | 0.82  | 0.02   |
| Top reason: Findings on chest X-ray                                                                          | 1.31 | 0.53 | 3.26  | 0.55   |
| I feel confident about indications to obtain a respiratory culture                                           | 0.56 | 0.34 | 0.91  | 0.02   |
| All ventilated PICU patients with new fever should get a respiratory culture                                 | 0.38 | 0.22 | 0.67  | <0.001 |
| All ventilated PICU patients with increased secretions should get a respiratory culture                      | 0.23 | 0.15 | 0.37  | <0.001 |
| Respiratory cultures are likely to grow bacteria from patients with tracheostomies                           | 6.81 | 4.27 | 10.86 | <0.001 |
| Respiratory cultures are likely to grow bacteria from patients with endotracheal tubes                       | 1.67 | 1.08 | 2.59  | 0.02   |

|                                                                                                                                |      |      |       |        |
|--------------------------------------------------------------------------------------------------------------------------------|------|------|-------|--------|
| The information from respiratory cultures is useful to guide antibiotic therapy                                                | 0.42 | 0.2  | 0.9   | 0.03   |
| Medication changes can influence secretion characteristics                                                                     | 0.69 | 0.43 | 1.12  | 0.13   |
| It is easy to obtain a secretion specimen                                                                                      | 0.74 | 0.48 | 1.14  | 0.17   |
| I would find a decision support algorithm helpful                                                                              | 1.42 | 0.83 | 2.44  | 0.20   |
| I expect I would follow a decision support algorithm                                                                           | 0.65 | 0.31 | 1.32  | 0.23   |
| Respiratory cultures are ordered too frequently in our unit                                                                    | 7.29 | 5.11 | 10.41 | <0.001 |
| The attending physician is typically included in the decision-making process                                                   | 0.77 | 0.55 | 1.07  | 0.12   |
| Nurses are typically included in the decision-making process                                                                   | 1.06 | 0.69 | 1.62  | 0.81   |
| Respiratory therapists are typically included in the decision-making process                                                   | 1.54 | 1.06 | 2.25  | 0.02   |
| Clinicians always conduct a physical exam                                                                                      | 0.82 | 0.66 | 1.02  | 0.08   |
| Clinicians always review patients' microbiology history                                                                        | 1.66 | 1.23 | 2.24  | 0.001  |
| Clinicians always review vital signs and other clinical data (e.g. labs, X-rays)                                               | 1.33 | 0.97 | 1.83  | 0.08   |
| Consulting services play an important role in the decision to order a respiratory culture                                      | 1.03 | 0.7  | 1.52  | 0.87   |
| Clinicians have a low threshold to order respiratory cultures                                                                  | 3.05 | 2.21 | 4.22  | <0.001 |
| Respiratory culture ordering practices vary among clinicians                                                                   | 4.78 | 3.23 | 7.08  | <0.001 |
| Respiratory culture ordering practices vary among patient populations                                                          | 3.6  | 2.7  | 4.81  | <0.001 |
| A decision support algorithm guiding when to obtain respiratory cultures would help align the ICU team and/or consulting teams | 0.97 | 0.52 | 1.8   | 0.93   |
| Practices vary widely between clinicians, so it will be difficult to standardize                                               | 1.9  | 1.42 | 2.54  | <0.001 |
| Some clinicians may be reluctant to change their practices                                                                     | 2.72 | 2.02 | 3.67  | <0.001 |
| There is insufficient evidence that respiratory cultures can be reduced safely                                                 | 4.32 | 2.22 | 8.4   | <0.001 |
| Clinicians may not change practices due to concern for missing a diagnosis of ventilator-associated pneumonia or tracheitis    | 3.73 | 2.7  | 5.15  | <0.001 |
| It is difficult to review pertinent clinical information from the electronic medical record                                    | 1.19 | 0.86 | 1.63  | 0.29   |
| It is difficult to perform physical exams prior to ordering a respiratory culture                                              | 1.22 | 0.64 | 2.35  | 0.55   |

|                                                                                        |      |      |      |        |
|----------------------------------------------------------------------------------------|------|------|------|--------|
| High patient care workload may make it difficult                                       | 0.95 | 0.62 | 1.45 | 0.81   |
| It is difficult to change respiratory culture practices for medically complex patients | 3.18 | 2.35 | 4.29 | <0.001 |
| Opinion of consulting services may differ                                              | 1.11 | 0.78 | 1.6  | 0.56   |
| Opinion of patient/caregiver may differ                                                | 0.96 | 0.67 | 1.39 | 0.83   |
